# Supplementary material
Source: PubMed Central journal article supplement (PMC3801037)
Supplement: 1313650110_pnas.201313650SI.pdf [file 1313650110_pnas.201313650SI.pdf]

# Supporting Information

Ono et al. 10.1073/pnas.1313650110

## SI Materials and Methods

**Transplantation Analysis.** Northwestern University's Animal Care and Use Committee approved all procedures involving animals in this study. Cultured leiomyoma (LM) cells infected with adenovirus or freshly isolated LM side population (LMSP) or LM mature population (LMMP) cells with primary myometrial (MM) cells were used for xenotransplantation. Cells were suspended into rat-tail collagen (type I) solution (BD Biosciences) at  $10^6$  cells/10  $\mu$ L (for cultured LM cells with adenoviral infection) or  $10^5$  cells/10  $\mu$ L (for freshly isolated LMSP or LMMP cells cultured with primary MM cells). We have used this method successfully to study the hormonal response of human endometrial and LM tissue in the past (1–3). With this technique, the low-density collagen gel consists mostly of water, and thus the pellet volume (10  $\mu$ L) does not reflect the starting volume of the tumor. When cell pellets are incubated at 37 °C overnight as floating cultures, they become smaller than 1 mm in diameter because of the contraction of the collagen by the LM and/or MM cells. Therefore, the estimated starting volume of the cell graft is smaller than 0.6 mm<sup>3</sup>. The grafting procedure was performed as described previously (1). Cell pellets were grafted onto opposing kidneys of adult female NOD-SCID (*IL2R $\gamma$ <sup>null</sup>*) mouse hosts (Jackson Laboratory). The cell pellets are high in water content and become smaller under the pressure of the subrenal capsule. The estimated starting volume of tissue grafts under the renal capsule was  $\sim$ 1 mm<sup>3</sup>. According to our previous report, estrogen and progesterone promote the growth of cells derived from uterine LM when transplanted under the kidney capsule (1). For this reason, all hosts were ovariectomized and supplemented with or without s.c. implantation of 80 mg progesterone (P) Sigma-Aldrich plus 80  $\mu$ g estrogen (E) (Sigma-Aldrich). These doses were chosen because previous studies demonstrated that they were able to sustain systemic E<sub>2</sub> and P<sub>4</sub> levels within cycling women (4). The effects of ovariectomy and hormone treatments were confirmed by the gross appearance and histology of the host female reproductive tracts. The presence of hormone pellets also was confirmed at when the mice were killed.

**Transfections and  $\beta$ -Catenin/T-Cell Factor Reporter Assay.** MM and LM cells were transfected with a TCF Optimal luciferase Promoter plasmid (TOPflash) containing four consensus T-cell factor (TCF)-binding sites upstream of a minimal c-fos promoter or FOPflash containing four mutant TCF-binding sites (kindly provided by H. Clevers, Utrecht, The Netherlands), using Lipofectamine 2000 (Invitrogen). A thymidine kinase-Renilla plasmid (50 ng) also was included to normalize luciferase values to the efficiency of transfection. Cells were treated 24 h after transfection. Cells were solubilized 2 d after transfection using the Dual-Luciferase Assay Kit (Promega), and luciferase activity was quantified with a Synergy-HT plate reader (Bio-Tek Instruments, Inc.). Each reporter plasmid/condition was transfected into cells plated in triplicate wells, and data are expressed as the mean  $\pm$  SD.

**Cadherin-Free  $\beta$ -Catenin-Binding Assays.** To evaluate activation of canonical wntless-type (WNT) signaling, intracellular levels of cadherin-free  $\beta$ -catenin were determined by pull-down assays using GST/ $\beta$ -catenin-interacting protein (ICAT), as previously described (5). Briefly, at the end of the experiments, cells were harvested, solubilized in a nonionic detergent buffer [1% Nonidet P-40 (Nonidet P-40), 50 mM Tris (pH 7.5), 150 mM NaCl, and 2 mM EDTA including protease inhibitors], and centrifuged

at 14,000  $\times$  g. Cellular  $\beta$ -catenin was affinity-precipitated using GST-ICAT immobilized to glutathione-coupled Sepharose (Sigma), washed with buffer A [10 mM Tris (pH 8.0), 140 mM NaCl, 1 mM EDTA, 0.1% Nonidet P-40, and 10  $\mu$ g/mL leupeptin and aprotinin], and subjected to SDS/PAGE and immunoblot analysis using  $\beta$ -catenin antibody (BD Biosciences).

**Immunofluorescence and Histological Analysis.** Indirect immunofluorescence staining was performed as described previously (6, 7). Background fluorescence was determined by applying the secondary conjugated antibody alone and by replacement of the primary antibody with nonimmune serum. Slides were successively stained with various antibodies as listed in Table S1, followed by incubation with secondary antibodies. Images were collected using a confocal laser scanning system (LSM 510, Karl Zeiss) in combination with an inverted microscope (Axiovert 200, Karl Zeiss).

**Hoechst 33342 Staining and FACS Analysis.** The dissociated cells were resuspended at a concentration of  $2 \times 10^6$  cells/mL in FACS solution (calcium- and magnesium-free HBSS containing 2% FBS). Hoechst 33342 (Sigma-Aldrich) was added at a final concentration of 5  $\mu$ g/mL, and the sample was incubated at 37 °C for 90 min. A parallel aliquot was stained with Hoechst 33342 dye in the presence of 50  $\mu$ M reserpine (Sigma-Aldrich). After incubation, the cells were centrifuged at 1,500 rpm for 7 min, resuspended in 2 mL cold FACS solution, and further incubated with 1  $\mu$ g/mL propidium iodide (PI) (Sigma-Aldrich) to label nonviable cells. The cells were kept on ice at all times after staining with the Hoechst 33342 dye. The Hoechst dye- and PI-treated cells were subjected to flow cytometric analysis to separate LMSP cells from LMMP cells. The cells were subjected to FACS sorting and analysis by FACSaria (BD Biosciences), MoFlo (Cytomation), and LSR Fortessa (BD Biosciences). LM cells were sorted by FACSaria and MoFlo and analyzed using the FlowJo software (Tree Star). After collecting  $1 \times 10^5$  events, the SP population was defined as previously reported (3, 6, 8–10). Forward scatter, side scatter, and PI gating excluded residual erythrocytes, debris, doublets, and dead cells. The purity of cell populations was verified directly after sorting as  $>98\%$ . The viability of sorted cells exceeded 90% as assessed by trypan blue exclusion.

**Ki-67 and TO-PRO-3 Staining.** After mixed coculturing, PKH-26<sup>+</sup> cells were harvested and fixed in cold 70% ethanol. Cells then were stained with antibodies against Ki-67 (BD Biosciences) and with TO-PRO-3 iodide (Life Technologies). All data were collected on an LSR Fortessa and analyzed with FlowJo software.

**Lactate Dehydrogenase Cell-Death Assay.** A cell-death assay was performed on mixed cocultured cells as previously described (11). Lactate dehydrogenase activity was measured using a Cytotoxicity Detection Kit (Roche). OD<sub>490</sub> was read using a Synergy-HT plate reader and software (Bio-Tek Instruments, Inc.).

**WNT Quantitative RT-PCR Array and Quantitative Real-Time RT-PCR.** Total RNA was extracted using the RNeasy Mini Kit, (Qiagen) according to the manufacturer's instructions. cDNA was synthesized from 1  $\mu$ g of RNA using the RT<sup>2</sup> First Strand cDNA synthesis kit (SA Biosciences). The RT<sup>2</sup> Profiler PCR arrays specific for the WNT signaling pathway (PAHS-043) was purchased from SA Biosciences and used according to the manufacturer's instructions. Quantitative real-time RT-PCR was performed as

described previously (12, 13). *GAPDH* transcripts were measured as an internal control. Primer pairs used for each PCR are listed in the Table S2. Amplification was performed using the ABI 7900HT (SA Biosciences) for 40 cycles, with each cycle consisting of a 15-s denaturation at 95.0 °C followed by 1 min of annealing at 60.0 °C.

1. Ishikawa H, et al. (2010) Progesterone is essential for maintenance and growth of uterine leiomyoma. *Endocrinology* 151(6):2433–2442.
2. Kurita T, et al. (2005) The activation function-1 domain of estrogen receptor alpha in uterine stromal cells is required for mouse but not human uterine epithelial response to estrogen. *Differentiation* 73(6):313–322.
3. Ono M, et al. (2012) Role of stem cells in human uterine leiomyoma growth. *PLoS ONE* 7(5):e36935.
4. McDonnell AC, Van Kirk EA, Isaak DD, Murdoch WJ (2005) Effects of progesterone on ovarian tumorigenesis in xenografted mice. *Cancer Lett* 221(1):49–53.
5. Gottardi CJ, Gumbiner BM (2004) Role for ICAT in beta-catenin-dependent nuclear signaling and cadherin functions. *Am J Physiol Cell Physiol* 286(4):C747–C756.
6. Masuda H, et al. (2010) Stem cell-like properties of the endometrial side population: Implication in endometrial regeneration. *PLoS ONE* 5(4):e10387.
7. Kurita T (2010) Developmental origin of vaginal epithelium. *Differentiation* 80(2-3): 99–105.
8. Mas A, et al. (2012) Identification and characterization of the human leiomyoma side population as putative tumor-initiating cells. *Fertil Steril* 98(3):741–751.e746.
9. Gargett CE, Chan RW, Schwab KE (2008) Hormone and growth factor signaling in endometrial renewal: Role of stem/progenitor cells. *Mol Cell Endocrinol* 288(1-2): 22–29.
10. Chang HL, et al. (2010) Uterine leiomyomas exhibit fewer stem/progenitor cell characteristics when compared with corresponding normal myometrium. *Reprod Sci* 17(2):158–167.
11. Flozak AS, et al. (2010) Beta-catenin/T-cell factor signaling is activated during lung injury and promotes the survival and migration of alveolar epithelial cells. *J Biol Chem* 285(5):3157–3167.
12. Xue Q, et al. (2007) Transcriptional activation of steroidogenic factor-1 by hypomethylation of the 5' CpG island in endometriosis. *J Clin Endocrinol Metab* 92(8): 3261–3267.
13. Ishikawa H, et al. (2008) CCAAT/enhancer binding protein beta regulates aromatase expression via multiple and novel cis-regulatory sequences in uterine leiomyoma. *J Clin Endocrinol Metab* 93(3):981–991.

**Statistical Analysis.** Tumor volume was measured using the program ImageJ (National Institutes of Health, <http://rsbweb.nih.gov/ezproxy.galter.northwestern.edu/ij/index.html>). *P* values were calculated using the unpaired Student *t* test. One-way ANOVA followed by Turkey's test and nonparametric *t* test were used for other statistical analysis. Values of *P* < 0.05 are considered significant.







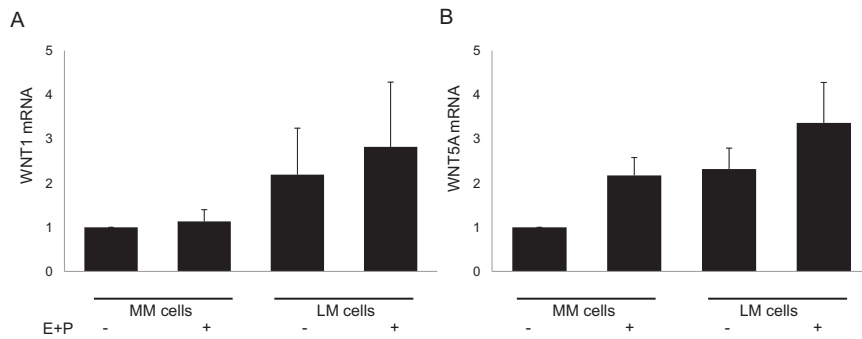

**Fig. 55.** E+P treatment does not alter the expression of *WNT1* and *WNT5A* genes in MM cells. (A and B) MM and LM cells were treated with E+P or vehicle before isolation of RNA and evaluation of WNT expression by real-time quantitative PCR as described in *SI Materials and Methods*. Results represent the mean of a minimum of four independent experiments. Error bars indicate SD. \* $P < 0.05$ .

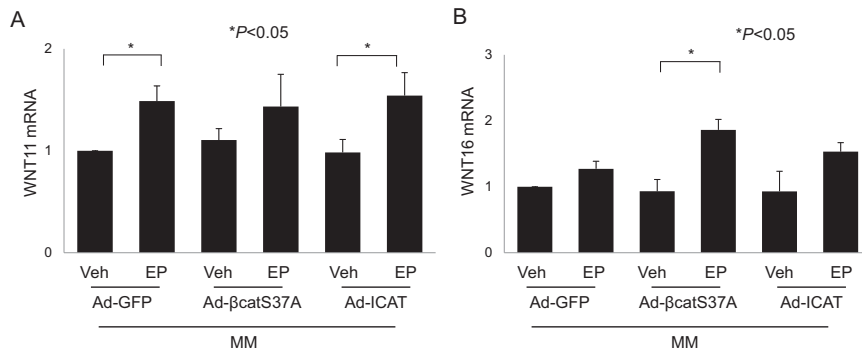

**Fig. 56.** Nondegradable  $\beta$ -catenin can activate the TCF/LEF reporter activity but cannot alter WNT secretion patterns in MM cells. (A and B) MM cells infected with adenovirus expressing S37A- $\beta$ -catenin or ICAT for 48 h did not alter the pattern of *WNT11* and *WNT16* gene expression pattern after E+P treatment. Error bars indicate SD. \* $P < 0.05$ .

**Table S1. Antibodies used in this study**

| Antigen          | Clone      | Isotype                    | Supplier                 |
|------------------|------------|----------------------------|--------------------------|
| $\beta$ -Catenin | 14         | Mouse IgG1                 | BD Biosciences           |
| ICAT             | Polyclonal | Rabbit IgG                 | Santa Cruz Biotechnology |
| $\beta$ -Actin   | AC-15      | Mouse IgG1                 | Sigma-Aldrich            |
| HA               | 16B12      | Mouse IgG1                 | Covance                  |
| $\alpha$ -SMA    | 1A4        | Cy3-conjugated mouse IgG2a | Sigma-Aldrich            |
| GFP              | MAB3580    | Mouse IgG1                 | Millipore                |
| Ki-67            | B56        | FITC-conjugated mouse IgG1 | BD Biosciences           |
